# Supplementary material for: Development and validation of the Sedentary Behavior Interruption Questionnaire (SB-IQ) for Assessing Behavioral Determinants in Older Adults Requiring Long-Term Care: a cross-sectional study
Source: Research Square preprint supplement (doi:10.21203/rs.3.rs-8556119/v1), 2026-02-09
Supplement: Supplementary file 1 [file 0e8f674d07c7e8f045656307.docx]

**Appendix 2. Final version of Sedentary Behavior Interruption Questionnaire (SB-IQ) in Japanese**

| **Domain** | **2nd item label** | **Final item label** | **Question** |
| --- | --- | --- | --- |
|
| Capability | C1 | 1 | 私は、長時間の座位行動を減らすための情報の内容や目的を知っている。  スコア：　全く当てはまらない＜ 1 ・ 2 ・ 3 ・ 4 ・ 5 ・ 6 ・ 7 ＞非常に当てはまる |
| C2 | 2 | 私は、自宅で日中に長時間の座位行動を中断する方法を知っている。  スコア：　全く当てはまらない＜ 1 ・ 2 ・ 3 ・ 4 ・ 5 ・ 6 ・ 7 ＞非常に当てはまる |
| C3 | 3 | 私は、自宅で日中に長時間の座位行動を中断するスキルを持っている。  スコア：　全く当てはまらない＜ 1 ・ 2 ・ 3 ・ 4 ・ 5 ・ 6 ・ 7 ＞非常に当てはまる |
| C23 | 4 | 自宅で日中に長時間の座位行動を中断することは、簡単に思い出せる。  スコア：　全く当てはまらない＜ 1 ・ 2 ・ 3 ・ 4 ・ 5 ・ 6 ・ 7 ＞非常に当てはまる |
| C24 | 5 | 自宅で日中に長時間の座位行動を中断するために集中する必要があるとき、問題なく注意を向けることができる。  スコア：　全く当てはまらない＜ 1 ・ 2 ・ 3 ・ 4 ・ 5 ・ 6 ・ 7 ＞非常に当てはまる |
| Opportunity | O27 | 6 | 社会政治的な状況において、長時間の座位行動を減らすことに関する情報に対して十分な経済的支援（例、地方自治体、保険会社、政府などから）がある。*社会政治的状況：あなたを取り巻く社会と政治（例、社会保険や福祉サービス）  スコア：　全く当てはまらない＜ 1 ・ 2 ・ 3 ・ 4 ・ 5 ・ 6 ・ 7 ＞非常に当てはまる |
| O28 | 7 | 社会政治的な状況において、長時間の座位行動を減らすための情報に関与する当事者間の良好なネットワークが存在する。  スコア：　全く当てはまらない＜ 1 ・ 2 ・ 3 ・ 4 ・ 5 ・ 6 ・ 7 ＞非常に当てはまる |
| O29 | 8 | 自宅で日中に長時間の座位行動を中断することが厳しくなる場合は、専門家チームを頼ることができる。  スコア：　全く当てはまらない＜ 1 ・ 2 ・ 3 ・ 4 ・ 5 ・ 6 ・ 7 ＞非常に当てはまる |
| O30 | 9 | 自宅で日中に長時間の座位行動を中断することに関する私の問題を、周りの人たちが聞こうとしてくれている。*私の周りの人たち：例えば、家族、友人、または医療スタッフなど。  スコア：　全く当てはまらない＜ 1 ・ 2 ・ 3 ・ 4 ・ 5 ・ 6 ・ 7 ＞非常に当てはまる |
| O31 | 10 | 専門家のチームは、自宅で日中に長時間の座位行動を中断することを手伝ってくれる。  スコア：　全く当てはまらない＜ 1 ・ 2 ・ 3 ・ 4 ・ 5 ・ 6 ・ 7 ＞非常に当てはまる |
| O32 | 11 | 自宅で日中に長時間の座位行動を中断することが厳しくなったとき、周囲の人たちに頼ることができる。*私の周りの人たち：例えば、家族、友人、または医療スタッフなど。  スコア：　全く当てはまらない＜ 1 ・ 2 ・ 3 ・ 4 ・ 5 ・ 6 ・ 7 ＞非常に当てはまる |
| O33 | 12 | 私にとって大切な人たちの大半は、私が自宅で日中に長時間の座位行動を中断すべきだと考えている。  　スコア：　全く当てはまらない＜ 1 ・ 2 ・ 3 ・ 4 ・ 5 ・ 6 ・ 7 ＞非常に当てはまる |
| O34 | 13 | 私の周りのお手本とされている人たちは、自宅で日中に長時間の座位行動を中断している。*私の周りの人たち：例えば、家族、友人、または医療スタッフなど。  スコア：　全く当てはまらない＜ 1 ・ 2 ・ 3 ・ 4 ・ 5 ・ 6 ・ 7 ＞非常に当てはまる |
| Beliefs about consequences | M9 | 14 | 自宅で日中に長時間の座位行動を中断することについては、悪いことよりも良いことが起きるのを期待している。  　スコア：　全くそう思わない＜ 1 ・ 2 ・ 3 ・ 4 ・ 5 ・ 6 ・ 7 ＞非常にそう思う |
| M12 | 15 | 私にとって、自宅で日中に長時間の座位行動を中断することは・・・（役に立たない – 役に立つ）ことである。  　スコア：　役に立たない＜ 1 ・ 2 ・ 3 ・ 4 ・ 5 ・ 6 ・ 7 ＞役に立つ |
| M13 | 16 | 私にとって、自宅で日中に長時間の座位行動を中断することは・・・（悪い – 良い）ことである。  　スコア：　悪い＜ 1 ・ 2 ・ 3 ・ 4 ・ 5 ・ 6 ・ 7 ＞良い |
| Goals | M17 | 17 | 自宅で日中に長時間の座位行動をどの様な【方法】で中断するか、明確な計画を立てている。  　スコア：　全く当てはまらない＜ 1 ・ 2 ・ 3 ・ 4 ・ 5 ・ 6 ・ 7 ＞非常に当てはまる |
| M18 | 18 | 自宅で日中に長時間の座位行動をどのような【状況】で中断するか、明確な計画を立てている。  　スコア：　全く当てはまらない＜ 1 ・ 2 ・ 3 ・ 4 ・ 5 ・ 6 ・ 7 ＞非常に当てはまる |
| M19 | 19 | 自宅で日中に長時間の座位行動を【いつ】中断するか、明確な計画を立てている。  　スコア：　全く当てはまらない＜ 1 ・ 2 ・ 3 ・ 4 ・ 5 ・ 6 ・ 7 ＞非常に当てはまる |
| M20 | 20 | 自宅で日中に長時間の座位行動を【どれだけの頻度】で中断するか、明確な計画を立てている。  スコア：　全く当てはまらない＜ 1 ・ 2 ・ 3 ・ 4 ・ 5 ・ 6 ・ 7 ＞非常に当てはまる |
| Beliefs about capabilities | M4 | 21 | やる気のないときでも、自宅で日中に長時間の座位行動を中断する自信がある。  　スコア：　全く当てはまらない＜ 1 ・ 2 ・ 3 ・ 4 ・ 5 ・ 6 ・ 7 ＞非常に当てはまる |
| M5 | 22 | 時間がないときでも、自宅で日中に長時間の座位行動を中断する自信がある。  　スコア：　全く当てはまらない＜ 1 ・ 2 ・ 3 ・ 4 ・ 5 ・ 6 ・ 7 ＞非常に当てはまる |
| M6 | 23 | その気になれば、自宅で日中に長時間の座位行動を中断する自信がある。  　スコア：　全く当てはまらない＜ 1 ・ 2 ・ 3 ・ 4 ・ 5 ・ 6 ・ 7 ＞非常に当てはまる |
| M7 | 24 | 私にとって、自宅で日中に長時間の座位行動を中断することは・・・（とても難しい-とても簡単）なことである。  　スコア：　とても難しい＜ 1 ・ 2 ・ 3 ・ 4 ・ 5 ・ 6 ・ 7 ＞とても簡単 |
| M8 | 25 | 自宅で日中に長時間の座位行動を中断することについては、いつも楽観的な見通しを持っている。  　スコア：　全くそう思わない＜ 1 ・ 2 ・ 3 ・ 4 ・ 5 ・ 6 ・ 7 ＞非常にそう思う |
| Behavioral regulation | M38 | 26 | 私は、自宅で日中に長時間の座位行動を中断することに向けた全体的な進捗状況を記録している。  スコア：　全く当てはまらない＜ 1 ・ 2 ・ 3 ・ 4 ・ 5 ・ 6 ・ 7 ＞非常に当てはまる |
| M39 | 27 | 私は、自宅で日中に長時間の座位行動を中断することに向けて努力しながら、日々の行動を自覚している。  スコア：　全く当てはまらない＜ 1 ・ 2 ・ 3 ・ 4 ・ 5 ・ 6 ・ 7 ＞非常に当てはまる |
| M40 | 28 | 私は、自宅で日中に長時間の座位行動を中断する習慣が身に付いているかどうか、定期的に確認している。  　スコア：　全く当てはまらない＜ 1 ・ 2 ・ 3 ・ 4 ・ 5 ・ 6 ・ 7 ＞非常に当てはまる |
