# Supplementary material for: Development and validation of the Sedentary Behavior Interruption Questionnaire (SB-IQ) for Assessing Behavioral Determinants in Older Adults Requiring Long-Term Care: a cross-sectional study
Source: Research Square preprint supplement (doi:10.21203/rs.3.rs-8556119/v1), 2026-02-09
Supplement: Supplementary file 2 [file 7e428efab90d620fb269167a.docx]

**Supplementary table 1: Drafting the preliminary version of the questionnaire**

| **COM-B** | **TDF** | **Item number*** | **Question content** |
| --- | --- | --- | --- |
| Capability | Knowledge | 1 | I am aware of the content and objectives of Information on reducing prolonged sedentary behavior. (Strongly disagree – strongly agree)  私は、長時間の座位行動を減らすための情報の内容や目的に気づいている。  (全く当てはまらない－非常に当てはまる) |
| 2 | I know the content and objectives of Information on reducing prolonged sedentary behavior. (Strongly disagree – strongly agree)  私は、長時間の座位行動を減らすための情報の内容や目的を知っている。  (全く当てはまらない－非常に当てはまる) |
| 3 | I am familiar with the content and objectives of Information on reducing prolonged sedentary behavior. (Strongly disagree – strongly agree)  私は、長時間の座位行動を減らすための情報の内容や目的を熟知している。  (全く当てはまらない－非常に当てはまる) |
| 4 | I am aware of how to interrupt the prolonged sedentary behavior in the daytime hours at home. (Strongly disagree – strongly agree)  私は、自宅で日中に長時間の座位行動を中断する方法に気づいている。  (全く当てはまらない－非常に当てはまる) |
| 5 | I know how to interrupt the prolonged sedentary behavior in the daytime hours at home. (Strongly disagree – strongly agree)  私は、自宅で日中に長時間の座位行動を中断する方法を知っている。  (全く当てはまらない－非常に当てはまる) |
| 6 | I am familiar with how to interrupt the prolonged sedentary behavior in the daytime hours at home. (Strongly disagree – strongly agree)  私は、自宅で日中に長時間の座位行動を中断する方法を熟知している。  (全く当てはまらない－非常に当てはまる) |
| Skills | 7 | I have been trained how to interrupt prolonged sedentary behavior in the daytime at home. (Strongly disagree – strongly agree)  私は、自宅で日中に長時間の座位行動を中断する方法を練習してきた。  (全く当てはまらない－非常に当てはまる) |
| 8 | I have the proficiency to interrupt prolonged sedentary behavior in the daytime at home. (Strongly disagree – strongly agree)  私は、自宅で日中に長時間の座位行動を中断することが得意だ。  (全く当てはまらない－非常に当てはまる) |
| 9 | I have the skills to interrupt prolonged sedentary behavior in the daytime at home. (Strongly disagree – strongly agree)  私は、自宅で日中に長時間の座位行動を中断するスキルを持っている。  (全く当てはまらない－非常に当てはまる) |
| 10 | I have practiced interrupt prolonged sedentary behavior in the daytime at home. (Strongly disagree – strongly agree)  私は、自宅で日中に長時間の座位行動の中断を実践している。  (全く当てはまらない－非常に当てはまる) |
| Motivation | Social/ professional role and identity | 11 | Interrupting the prolonged sedentary behavior in the daytime at home is part of my work as a my role. (Strongly disagree – strongly agree)  自宅で日中に長時間の座位行動を中断させることは、私の役割である。  (全く当てはまらない－非常に当てはまる) |
| 12 | As a my role, it is my job to Interrupt prolonged sedentary behavior in the daytime at home. (Strongly disagree – strongly agree)  自宅で日中に長時間の座位行動を中断させるのは私の務めである。  (全く当てはまらない－非常に当てはまる) |
| 13 | It is my responsibility as a my role to Interrupt prolonged sedentary behavior in the daytime at home. (Strongly disagree – strongly agree)  自宅で日中に長時間の座位行動を中断させるのは、自分の役割において果たすべき責務である。(全く当てはまらない－非常に当てはまる) |
| 14 | Doing Interrupting prolonged sedentary behavior in the daytime at home is consistent with my role. (Strongly disagree – strongly agree)  自宅で日中に長時間の座位行動を中断させることは私の役割に合致している。  (全く当てはまらない－非常に当てはまる) |
| Beliefs about capabilities | 15 | I am confident that I can interrupt prolonged sedentary behavior in the daytime at home even when I am not motivated. (Strongly disagree – strongly agree)  やる気のないときでも、自宅で日中に長時間の座位行動を中断する自信がある。  (全く当てはまらない－非常に当てはまる) |
| 16 | I am confident that I can interrupt prolonged sedentary behavior in the daytime at home even when there is little time. (Strongly disagree – strongly agree)  時間がないときでも、自宅で日中に長時間の座位行動を中断する自信がある。  (全く当てはまらない－非常に当てはまる) |
| 17 | I am confident that if I wanted I could interrupt prolonged sedentary behavior in a daytime at home. (Strongly disagree – strongly agree)  その気になれば、自宅で日中に長時間の座位行動を中断する自信がある。  (全く当てはまらない－非常に当てはまる) |
| 18 | How much control do you have over interrupting prolonged sedentary behavior in the daytime at home? (No control at all – a lot of control)  自宅で日中に長時間の座位行動を中断することを、あなたはどの程度制御できますか。(全く制御できない－かなり制御できる) |
| 19 | For me, interrupting prolonged sedentary behavior in the daytime at home is…  (Very difficult – very easy).  私にとって、自宅で日中に長時間の座位行動を中断することは...（とても難しい-とても簡単）なことである。 |
| 20 | For me, interrupting prolonged sedentary behavior in the daytime at home is… (Impossible – possible).  私にとって、自宅で日中に長時間の座位行動を中断することは...(不可能－可能)である。 |
| Optimism | 21 | With regard to interrupt prolonged sedentary behavior in the daytime at home in uncertain Times, I usually expect the best. (Strongly disagree – strongly agree)  先の見通しが立たない場合でも、自宅で日中に長時間の座位行動を中断することについては、私はたいてい最善を尽くすことを望んでいる。  (まったくそう思わない – 非常にそう思う) |
| 22 | With regard to interrupt prolonged sedentary behavior in the daytime at home I’m always optimistic about the future. (Strongly disagree – strongly agree)  自宅で日中に長時間の座位行動を中断することについては、いつも楽観的な見通しを持っている。(まったくそう思わない – 非常にそう思う) |
| 23 | With regard to interrupt prolonged sedentary behavior in the daytime at home overall, I expect more good things to happen than bad.  (Strongly disagree – strongly agree)  自宅で日中に長時間の座位行動を中断することについては、悪いことよりも良いことが起きるのを期待している。(まったくそう思わない – 非常にそう思う) |
| 24 | With regard to interrupt prolonged sedentary behavior in the daytime at home if something can go wrong, it will. (Strongly disagree – strongly agree)  自宅での日中の座位行動を中断することに関して、何かうまくいかなければ、その通りになると思う。(まったくそう思わない – 非常にそう思う) |
| 25 | With regard to interrupt prolonged sedentary behavior in the daytime at home I hardly ever expect things to go my way. (Strongly disagree – strongly agree)  自宅で日中に長時間の座位行動を中断することについては、自分の思い通りになるとは到底思えない。(まったくそう思わない – 非常にそう思う) |
| 26 | With regard to interrupt prolonged sedentary behavior in the daytime at home I rarely count on good things happening to me. (Strongly disagree – strongly agree)  自宅で日中に長時間の座位行動を中断することについては、ほとんど良いことは起こらないと思っている。(まったくそう思わない – 非常にそう思う) |
| Beliefs about consequences | 27 | For me, Interrupting prolonged sedentary behavior in the daytime at home is… (Useless – useful).  私にとって、自宅で日中に長時間の座位行動を中断することは…(役に立たない – 役に立つ)ことである。 |
| 28 | For me, interrupting prolonged sedentary behavior in the daytime at home is… (Bad – good).  私にとって、自宅で日中に長時間の座位行動を中断することは…(悪い – 良い)ことである。 |
| 29 | If I interrupt prolonged sedentary behavior in the daytime at home it will benefit my health. (Strongly disagree – strongly agree)  自宅で日中に長時間の座位行動を中断することは健康に良い。  (全く当てはまらない－非常に当てはまる) |
| 30 | If I interrupt prolonged sedentary behavior in the daytime at home it will have disadvantages for my relationship. (Strongly disagree – strongly agree)  自宅で日中に長時間の座位行動を中断することは、人間関係に不利益を生じさせる。(全く当てはまらない－非常に当てはまる) |
| Reinforcement | 31 | Whenever I interrupt prolonged sedentary behavior in the daytime at home, I get financial reimbursement. (Never – always)  自宅で日中に長時間の座位行動を中断すると、その都度、金銭的な報酬が受けられる。(決してない – いつも) |
| 32 | Whenever I interrupt prolonged sedentary behavior in the daytime at home, I get recognition from professionals who are important to me. (Never – always)  自宅で日中に長時間の座位行動を中断すると、私にとって重要な専門家から評価を受けることができる。(決してない – いつも) |
| 33 | If I interrupt prolonged sedentary behavior in the daytime at home, I feel like I am making a difference. (Never – always)  自宅で日中に長時間の座位行動を中断すると、自分は変化を起こしていると感じる。 (決してない – いつも) |
| Intentions | 34 | For how many of the next 10 opportunities do you intend to interrupt prolonged sedentary behavior in your home? (1 – 10)  今後10回のうち、何回自宅で長時間の座位行動を中断しようと思いますか？(1 – 10) |
| 35 | I will definitely interrupt prolonged sedentary behavior in your home in the next daytime. (Strongly disagree – strongly agree)  次の日に、自宅で長時間の座位行動を必ず中断する。  (全く当てはまらない－非常に当てはまる) |
| 36 | I intend to interrupt prolonged sedentary behavior in your home in the next daytime. (Strongly disagree – strongly agree)  次の日に、自宅で長時間の座位行動を中断するつもりである。  (全く当てはまらない－非常に当てはまる) |
| 37 | How strong is your intention to interrupt prolonged sedentary behavior in your home in the next daytime? (Not strong at all – very strong)  次の日に、自宅で長時間の座位行動を中断する意志はどの程度強いか。  (まったく強くない – 非常に強い) |
| Goals | 38 | I have a clear plan of how I will interrupt prolonged sedentary behavior in the daytime at home. (Strongly disagree – strongly agree)  自宅で日中に長時間の座位行動をどの様な方法で中断するか、明確な計画を立てている。(全く当てはまらない－非常に当てはまる) |
| 39 | I have a clear plan under what circumstances I will interrupt prolonged sedentary behavior in the daytime at home. (Strongly disagree – strongly agree)  自宅で日中に長時間の座位行動をどのような状況で中断するか、明確な計画を立てている。(全く当てはまらない－非常に当てはまる) |
| 40 | I have a clear plan when I will interrupt prolonged sedentary behavior in the daytime at home. (Strongly disagree – strongly agree)  自宅で日中に長時間の座位行動をいつ中断するか、明確な計画を立てている。  (全く当てはまらない－非常に当てはまる) |
| 41 | I have a clear plan how often I will interrupt prolonged sedentary behavior in the daytime at home. (Strongly disagree – strongly agree)  自宅で日中に長時間の座位行動をどれだけの頻度で中断するか、明確な計画を立てている。(全く当てはまらない－非常に当てはまる) |
| 42 | Generally, in the daytime at home, how often is covering something else on your agenda a higher priority than interrupting prolonged sedentary behavior.  (Never – always)  通常、日中に自宅で長時間の座位行動を中断することよりも、他の予定を優先することがどれくらい頻繁にありますか。(決してない – いつも) |
| 43 | Generally, in the daytime at home, how often does covering something else on your agenda take precedence over interrupting prolonged sedentary behavior.  (Never – always)  通常、日中に自宅で長時間の座位行動を中断することよりも、他の予定を先行することがどれくらい頻繁にありますか。(決してない – いつも) |
| 44 | Generally, in the daytime at home, how often is covering something else on your agenda more urgent than interrupting prolonged sedentary behavior.  (Never – always)  通常、日中に自宅で長時間の座位行動を中断することよりも、他の緊急性の高い事項を行うことがどれくらい頻繁にありますか。(決してない – いつも) |
| 45 | Generally, in the daytime hours at home, how often is covering something else on your agenda more pressing than interrupting prolonged sedentary behavior. (Never – always)  通常、日中に自宅で長時間の座位行動を中断することよりも、他の急を要する物事を優先することがどれくらい頻繁にありますか。(決してない – いつも) |
| Capability | Memory, attention and decision processes | 46 | interrupting prolonged sedentary behavior in a daytime at home is easy to remember. (Strongly disagree – strongly agree)  自宅で日中に長時間の座位行動を中断することは、簡単に思い出せる。  (全く当てはまらない－非常に当てはまる) |
| 47 | How often do you forget interrupting prolonged sedentary behavior in the daytime at home? (Never – almost always)  自宅で日中に長時間の座位行動を中断することを忘れてしまうことはどれくらい頻繁にありますか。(決してない – いつも) |
| 48 | How often do you have to check the Information on reducing prolonged sedentary behavior before interrupting prolonged sedentary behavior in the daytime at home? (Never – almost always)  自宅で日中に長時間の座位行動を中断する前に、そのための情報をどれくらい頻繁に確認しなければなりませんか。(決してない – いつも) |
| 49 | To what extent do you know Information on reducing prolonged sedentary behavior by heart to interrupt prolonged sedentary behavior in the daytime at home. (Not at all – very much so)  自宅で日中に長時間の座位行動を中断するために、そのことを覚えておくための情報をどの程度知っていますか。(まったくない – たくさんある) |
| 50 | When I need to concentrate to interrupt prolonged sedentary behavior in the daytime at home, I have no trouble focusing my attention.  (Strongly disagree – strongly agree)  自宅で日中に長時間の座位行動を中断するために集中する必要があるとき、問題なく注意を向けることができる。(全く当てはまらない－非常に当てはまる) |
| 51 | When I am working hard on interrupting prolonged sedentary behavior in the daytime at home, I still get distracted by events around me.  (Strongly disagree – strongly agree)  自宅で日中に長時間の座位行動を中断することに努力しているとき、周りの出来事に気を取られてしまう。(全く当てはまらない－非常に当てはまる) |
| 52 | When trying to focus my attention on interrupting prolonged sedentary behavior in the daytime at home, I have difficulty blocking out distracting thoughts. (Strongly disagree – strongly agree)  自宅で日中に長時間の座位行動を中断することに集中しようとするとき、雑念を追い払うのが難しい。(全く当てはまらない－非常に当てはまる) |
| 53 | When concentrating on interrupting prolonged sedentary behavior in the daytime at home, I can focus my attention so that I become unaware of what’s going on around me. (Strongly disagree – strongly agree)  自宅で日中に長時間の座位行動を中断することに集中しているとき、周囲の状況が気にならなくなるくらい集中することができる。  (全く当てはまらない－非常に当てはまる) |
| Opportunity | Environmental context and resources | 54 | Information on reducing prolonged sedentary behavior that I have has a good fit with routine practice. (Strongly disagree – strongly agree)  私が持っている長時間の座位行動を減らすことに関する情報は、日常的な実践にうまく合致している。(全く当てはまらない－非常に当てはまる) |
| 55 | Information on reducing prolonged sedentary behavior that I have provides the possibility to adapt it to my needs. (Strongly disagree – strongly agree)  私が持っている長時間の座位行動を減らすことに関する情報は、私の必要と感じていることに活用できる。(全く当てはまらない－非常に当てはまる) |
| 56 | In my community I belong interrupting prolonged sedentary behavior in the daytime at home is routine. (Strongly disagree – strongly agree)  私が属するコミュニティでは、各自が自宅で日中に長時間の座位行動を中断することは日常的なことである。(全く当てはまらない－非常に当てはまる) |
| 57 | In my community I belong there is enough time to interrupt prolonged sedentary behavior in the daytime at home. (Strongly disagree – strongly agree)  私が属するコミュニティでは、自宅で日中に長時間の座位行動を中断するのに十分な時間がある。(全く当てはまらない－非常に当てはまる) |
| 58 | Within the socio-political context there is sufficient financial support (e.g., from local authorities, insurance companies, the government) for Information on reducing prolonged sedentary behavior. (Strongly disagree – strongly agree)  社会政治的な状況において、長時間の座位行動を減らすことに関する情報に対して十分な経済的支援（例、地方自治体、保険会社、政府などから）がある。  (全く当てはまらない－非常に当てはまる) |
| 59 | Within the socio-political context there are good networks between parties involved in Information on reducing prolonged sedentary behavior.  (Strongly disagree – strongly agree)  社会政治的な状況において、長時間の座位行動を減らすための情報に関与する当事者間の良好なネットワークが存在する。(全く当てはまらない－非常に当てはまる) |
| 60 | Prior to delivery of Information on reducing prolonged sedentary behavior I am provided with a training to interrupt prolonged sedentary behavior in the daytime at home. (Strongly disagree – strongly agree)  長時間の座位行動を減らすことに関する情報が届く前に、自宅で日中に長時間の座位行動を中断するためのトレーニングを受けている。  (全く当てはまらない－非常に当てはまる) |
| 61 | During the delivery of Information on reducing prolonged sedentary behavior I am provided with sufficient financial reimbursement to interrupt prolonged sedentary behavior in the daytime at home. (Strongly disagree – strongly agree)  長時間の座位行動を減らすことに関する情報が届く際に、自宅で日中に長時間の座位行動を中断するために十分な経済的支援を提供されている。  (全く当てはまらない－非常に当てはまる) |
| Social influences | 62 | I can rely on the team of professionals when things get tough on interrupting prolonged sedentary behavior in the daytime at home.  (Strongly disagree – strongly agree)  自宅で日中に長時間の座位行動を中断することが厳しくなる場合は、専門家チームを頼ることができる。(全く当てはまらない－非常に当てはまる) |
| 63 | People around me are willing to listen to my problems related to interrupt prolonged sedentary behavior in the daytime at home.  (Strongly disagree – strongly agree)  自宅で日中に長時間の座位行動を中断することに関する私の問題を、周りの人たちが聞こうとしてくれている。(全く当てはまらない－非常に当てはまる) |
| 64 | The team of professionals is helpful in getting interrupting prolonged sedentary behavior in a daytime at home done. (Strongly disagree – strongly agree)  専門家のチームは、自宅で日中に長時間の座位行動を中断することを手伝ってくれる。(全く当てはまらない－非常に当てはまる) |
| 65 | I can rely on people around me when things get tough on interrupting prolonged sedentary behavior in a daytime at home. (Strongly disagree – strongly agree)  自宅で日中に長時間の座位行動を中断することが厳しくなったとき、周囲の人たちに頼ることができる。(全く当てはまらない－非常に当てはまる) |
| 66 | Most people who are important to me think that I should interrupt prolonged sedentary behavior in the daytime at home. (Strongly disagree – strongly agree)  私にとって大切な人たちの大半は、私が自宅で日中に長時間の座位行動を中断すべきだと考えている。(全く当てはまらない－非常に当てはまる) |
| 67 | Most people whose opinion I value would approve me of interrupting prolonged sedentary behavior in the daytime at home. (Strongly disagree – strongly agree)  私が意見を大切にしている人たちの大半は、私が自宅で日中に長時間の座位行動を中断することを認めてくれる。(全く当てはまらない－非常に当てはまる) |
| 68 | Respected people around me interrupt prolonged sedentary behavior in the daytime at home. (Strongly disagree – strongly agree)  私の周りのお手本とされている人たちは、自宅で日中に長時間の座位行動を中断している。(全く当てはまらない－非常に当てはまる) |
| Motivation | Emotion | 69 | Thinking about yourself, to what extent do you generally feel inspired with regard to interrupt prolonged sedentary behavior in the daytime at home. (Never-always)  あなたは、自分自身のことを考えたときに、自宅で日中に長時間の座位行動を中断することに関して、普段はどの程度やる気を感じていますか。  (まったくない – いつもそうである) |
| 70 | Thinking about yourself, to what extent do you generally feel nervous with regard to interrupt prolonged sedentary behavior in the daytime at home. (Never-always)  あなたは、自分自身のことを考えたときに、自宅で日中に長時間の座位行動を中断することに関して、普段はどの程度不安を感じますか。  (まったくない – いつもそうである) |
| 71 | Have you recently, during the past two weeks been able to enjoy your normal day-to-day activities? (Never-always)  最近、この2週間の間に、通常の日常活動を楽しむことができましたか。  (まったくない – いつもそうである) |
| 72 | Have you recently, during the past two weeks been feeling unhappy and depressed? (Never-always)  最近、この2週間の間に、不幸で憂うつな気分になったことがありますか。  (まったくない – いつもそうである) |
| Behavioral regulation | 73 | interrupting prolonged sedentary behavior in the daytime at home is something I do automatically. (Strongly disagree – strongly agree)  自宅で日中に長時間の座位行動を中断することは、意識せずにやっていることである。(全く当てはまらない－非常に当てはまる) |
| 74 | interrupting prolonged sedentary behavior in the daytime at home is something I do without thinking. (Strongly disagree – strongly agree)  自宅で日中に長時間の座位行動を中断することは、何気なく私がやっていることである。(全く当てはまらない－非常に当てはまる) |
| 75 | I keep track of my overall progress towards interrupting prolonged sedentary behavior in the daytime at home. (Strongly disagree – strongly agree)  私は、自宅で日中に長時間の座位行動を中断することに向けた全体的な進捗状況を記録している。(全く当てはまらない－非常に当てはまる) |
| 76 | I tend to notice my successes while working towards interrupting prolonged sedentary behavior in the daytime at home. (Strongly disagree – strongly agree)  私は、自宅で日中に長時間の座位行動を中断することに向けて努力しているとき、自分が上手くできていることによく気づく。  (全く当てはまらない－非常に当てはまる) |
| 77 | I am aware of my day-to-day behavior as I work towards interrupting prolonged sedentary behavior in the daytime at home. (Strongly disagree – strongly agree)  私は、自宅で日中に長時間の座位行動を中断することに向けて努力しながら、日々の行動を自覚している。(全く当てはまらない－非常に当てはまる) |
| 78 | I check regularly whether I am getting closer to attaining making a habit of interrupting prolonged sedentary behavior in the daytime at home.  (Strongly disagree – strongly agree)  私は、自宅で日中に長時間の座位行動を中断する習慣が身に付いているかどうか、定期的に確認している。(全く当てはまらない－非常に当てはまる) |
| 79 | I have a clear plan of how I will interrupt prolonged sedentary behavior in the daytime at home. (Strongly disagree – strongly agree)  自宅で日中に長時間の座位行動をどのような方法で中断させるかについて、明確な計画がある。(全く当てはまらない－非常に当てはまる) |
| 80 | I have a clear plan under what circumstances I will interrupt prolonged sedentary behavior in the daytime at home. (Strongly disagree – strongly agree)  自宅で日中に長時間の座位行動をどのような状況で中断するかについて、明確な計画がある。(全く当てはまらない－非常に当てはまる) |
| 81 | I have a clear plan when I will interrupt prolonged sedentary behavior in the daytime at home. (Strongly disagree – strongly agree)  自宅で日中に長時間の座位行動をいつ中断するかについて、明確な計画がある。  (全く当てはまらない－非常に当てはまる) |
| 82 | I have a clear plan how often I will interrupt prolonged sedentary behavior in the daytime at home. (Strongly disagree – strongly agree)  自宅で日中に長時間の座位行動をどれくらいの頻度で中断するかについて、明確な計画がある。(全く当てはまらない－非常に当てはまる) |

*The item number corresponds to the version of the preliminary questionnaire.

**Supplemental table 2: Items removed based on the authors’ initial screening and the reasons for their removal**

| **Items removed** | **Reason for removal** | **Question content** |
| --- | --- | --- |
| 1 | Items 1–3 contained overlapping content; therefore, Item 2, which was the easiest for older adults receiving long-term care services to understand, was retained, and the others were removed. | I am aware of the content and objectives of Information on reducing prolonged sedentary behavior. (Strongly disagree – strongly agree) |
| 3 | I am familiar with the content and objectives of Information on reducing prolonged sedentary behavior. (Strongly disagree – strongly agree) |
| 4 | Items 4–6 contained overlapping content; therefore, Item 5, which was the easiest for older adults receiving long-term care services to understand, was retained, and the others were removed. | I am aware of how to interrupt the prolonged sedentary behavior in the daytime hours at home. (Strongly disagree – strongly agree) |
| 6 | I am familiar with how to interrupt the prolonged sedentary behavior in the daytime hours at home. (Strongly disagree – strongly agree) |
| 8 | This item was excluded because very few participants were expected to be proficient in interrupting sedentary behavior. | I have the proficiency to interrupt prolonged sedentary behavior in the daytime at home. (Strongly disagree – strongly agree) |
| 11 | This domain pertained to professional roles, and was therefore removed because it was difficult to adapt it as a question about interrupting sedentary behavior at home for older adults receiving long-term care services. | Interrupting the prolonged sedentary behavior in the daytime at home is part of my work as a my role. (Strongly disagree – strongly agree) |
| 12 | As a my role, it is my job to Interrupt prolonged sedentary behavior in the daytime at home. (Strongly disagree – strongly agree) |
| 13 | It is my responsibility as a my role to Interrupt prolonged sedentary behavior in the daytime at home. (Strongly disagree – strongly agree) |
| 14 | Doing Interrupting prolonged sedentary behavior in the daytime at home is consistent with my role. (Strongly disagree – strongly agree) |
| 20 | Items 19 and 20 both addressed perceived difficulty and were therefore redundant. Item 19, which was expressed in a way that was easier for older adults receiving long-term care services to understand, was retained, and Item 20 was removed. | For me, interrupting prolonged sedentary behavior in the daytime at home is… (Impossible – possible). |
| 21 | This item was removed because its wording was convoluted, making it difficult for older adults receiving long-term care services to understand when asking about optimism or pessimism regarding the interruption of sedentary behavior. | With regard to interrupt prolonged sedentary behavior in the daytime at home in uncertain Times, I usually expect the best.  (Strongly disagree – strongly agree) |
| 24 | With regard to interrupt prolonged sedentary behavior in the daytime at home if something can go wrong, it will.  (Strongly disagree – strongly agree) |
| 30 | Items 30 and 31 were removed because they were clearly incompatible as questions regarding the interruption of sedentary behavior among older adults receiving long-term care services. | If I interrupt prolonged sedentary behavior in the daytime at home it will have disadvantages for my relationship.  (Strongly disagree – strongly agree) |
| 31 | Whenever I interrupt prolonged sedentary behavior in the daytime at home, I get financial reimbursement. (Never – always) |
| 34 | This item was removed because it was considered difficult for participants to imagine the “next 10 opportunities” regarding prolonged sedentary behavior at home. | For how many of the next 10 opportunities do you intend to interrupt prolonged sedentary behavior in your home? (1 – 10) |
| 35 | Items 35 and 36 contained overlapping content; therefore, Item 36, which could capture a broader and less decisive state of intention, was retained, and Item 35 was removed. | I will definitely interrupt prolonged sedentary behavior in your home in the next daytime. (Strongly disagree – strongly agree) |
| 43 | Items 42 and 43 conveyed nearly identical meanings; therefore, Item 42, which was expressed in a way that was easier for older adults receiving long-term care services to understand, was retained, and Item 43 was removed. | Generally, in the daytime at home, how often does covering something else on your agenda take precedence over interrupting prolonged sedentary behavior. (Never – always) |
| 44 | Items 44 and 45 conveyed almost the same meaning; therefore, Item 45, which more accurately conveyed a higher level of urgency and was considered easier for older adults receiving long-term care services to understand, was retained, and Item 44 was removed. | Generally, in the daytime at home, how often is covering something else on your agenda more urgent than interrupting prolonged sedentary behavior. (Never – always) |
| 49 | Item 49 was removed because it indirectly asked about memory and was therefore difficult to understand. | To what extent do you know Information on reducing prolonged sedentary behavior by heart to interrupt prolonged sedentary behavior in the daytime at home. (Not at all – very much so) |
| 52 | This item was removed because its content was considered difficult to understand as a question asking about the elements of attention required when older adults receiving long-term care services attempt to interrupt prolonged sedentary behavior at home. | When trying to focus my attention on interrupting prolonged sedentary behavior in the daytime at home, I have difficulty blocking out distracting thoughts. (Strongly disagree – strongly agree) |
| 53 | When concentrating on interrupting prolonged sedentary behavior in the daytime at home, I can focus my attention so that I become unaware of what’s going on around me. (Strongly disagree – strongly agree) |
| 55 | Items 54 and 55 overlapped in meaning; the expression “to my needs” in Item 55 was considered too broad in interpretation for older adults receiving long-term care services. Therefore, the more specific Item 54 was retained, and Item 55 was removed. | Information on reducing prolonged sedentary behavior that I have provides the possibility to adapt it to my needs.  (Strongly disagree – strongly agree) |
| 57 | It was difficult to adapt this as a question regarding the interruption of sedentary behavior during the daytime. | In my community I belong there is enough time to interrupt prolonged sedentary behavior in the daytime at home.  (Strongly disagree – strongly agree) |
| 60 | This item was removed because it asked about a situation unlikely to be encountered by older adults receiving long-term care services. | Prior to delivery of Information on reducing prolonged sedentary behavior I am provided with a training to interrupt prolonged sedentary behavior in the daytime at home. (Strongly disagree – strongly agree) |
| 61 | During the delivery of Information on reducing prolonged sedentary behavior I am provided with sufficient financial reimbursement to interrupt prolonged sedentary behavior in the daytime at home. (Strongly disagree – strongly agree) |
| 71 | This item was removed because it was not a question about sedentary behavior. | Have you recently, during the past two weeks been able to enjoy your normal day-to-day activities? (Never-always) |
| 72 | Have you recently, during the past two weeks been feeling unhappy and depressed? (Never-always) |
| 74 | Items 73 and 74 were similar in content; therefore, Item 73, which was more direct and easier for older adults receiving long-term care services to understand, was retained, and Item 74 was removed. | interrupting prolonged sedentary behavior in the daytime at home is something I do without thinking. (Strongly disagree – strongly agree) |
| 76 | Items 76 and 77 were similar in content; the expression “my successes” in Item 76 was considered ambiguous and difficult for older adults receiving long-term care services to understand. Therefore, Item 77 was retained, and Item 76 was removed. | I tend to notice my successes while working towards interrupting prolonged sedentary behavior in the daytime at home.  (Strongly disagree – strongly agree) |
| 79 | This item was very similar to Items 38, 39, 40, and 41, which pertained to goals, and was therefore considered more appropriately classified as a goal-related item. Consequently, it was removed. | I have a clear plan of how I will interrupt prolonged sedentary behavior in the daytime at home. (Strongly disagree – strongly agree) |
| 80 | I have a clear plan under what circumstances I will interrupt prolonged sedentary behavior in the daytime at home.  (Strongly disagree – strongly agree) |
| 81 | I have a clear plan when I will interrupt prolonged sedentary behavior in the daytime at home. (Strongly disagree – strongly agree) |
| 82 | I have a clear plan how often I will interrupt prolonged sedentary behavior in the daytime at home. (Strongly disagree – strongly agree) |

**Supplementary table 3: Results of the Item-level Content Validity Index from the Delphi survey**

| **Item number†** | **Round 1** | **Round 2** | **Round 3** |
| --- | --- | --- | --- |
| 2 | 87.5% (1) | 87.5% (0)* |  |
| 5 | 87.5% (0)* |  |  |
| 7 | 75.0% (1) | 75.0% (1) |  |
| 9 | 75.0% (0) | 75.0% (0) | 100% (0)* |
| 10 | 62.5% (2) | 50.0% (3) |  |
| 15 | 87.5% (1) | 100.0% (0)* |  |
| 16 | 87.5% (1) | 100.0% (0)* |  |
| 17 | 75.0% (0) | 87.5% (0)* |  |
| 18 | 62.5% (2) | 62.5% (2) |  |
| 19 | 75.0% (0) | 87.5% (0)* |  |
| 22 | 75.0% (0) | 100.0% (0)* |  |
| 23 | 62.5% (1) | 87.5% (0)* |  |
| 25 | 75.0% (0) | 87.5% (0)* |  |
| 26 | 50.0% (1) | 75.0% (0) | 100% (0)* |
| 27 | 75.0% (0) | 100.0% (0)* |  |
| 28 | 75.0% (0) | 100.0% (0)* |  |
| 29 | 62.5% (1) | 50.0% (1) |  |
| 32 | 62.5% (0) | 87.5% (0)* |  |
| 33 | 75.0% (0) | 75.0% (0) | 75.0% (0) |
| 36 | 100.0% (0)* |  |  |
| 37 | 87.5% (0)* |  |  |
| 38 | 87.5% (1) | 100.0% (0)* |  |
| 39 | 100.0% (0)* |  |  |
| 40 | 100.0% (0)* |  |  |
| 41 | 87.5% (0)* |  |  |
| 42 | 100.0% (0)* |  |  |
| 45 | 87.5% (0)* |  |  |
| 46 | 100.0% (0)* |  |  |
| 47 | 75.0% (0) | 75.0% (2) |  |
| 48 | 50.0% (2) | 50.0% (2) |  |
| 50 | 100.0% (0)* |  |  |
| 51 | 100.0% (0)* |  |  |
| 54 | 62.5% (1) | 62.5% (1) |  |
| 56 | 62.5% (1) | 87.5% (0)* |  |
| 58 | 87.5% (0)* |  |  |
| 59 | 75.0% (0) | 100.0% (0)* |  |
| 62 | 75.0% (1) | 87.5% (0)* |  |
| 63 | 87.5% (0)* |  |  |
| 64 | 87.5% (0)* |  |  |
| 65 | 87.5% (1) | 100.0% (0)* |  |
| 66 | 62.5% (1) | 87.5% (0)* |  |
| 67 | 75.0% (0) | 75.0% (1) |  |
| 68 | 75.0% (0) | 100.0% (0)* |  |
| 69 | 87.5% (0)* |  |  |
| 70 | 87.5% (0)* |  |  |
| 73 | 100.0% (0)* |  |  |
| 75 | 87.5% (1) | 100.0% (0)* |  |
| 77 | 100.0% (0)* |  |  |
| 78 | 87.5% (1) | 100.0% (0)* |  |
| S-CVI | | | 88.8% |

Values represent the Item-level Content Validity Index as a percentage, with the number of respondents who rated the item as 1–4 shown in parentheses.

Items shaded in gray indicate those for which consensus was not reached.

*　Items with an Item-level Content Validity Index of 80% or higher and no respondents rating the item as 1–4 (items judged to have consensus)

† The item number corresponds to the version of the preliminary questionnaire.

**Supplementary table 4: Second version of the questionnaire developed from the preliminary version and used in the main survey**

| **Item label (COM-B)** | **Revised item number*** | **Question content** |
| --- | --- | --- |
| Capability | C1 | I know the content and objectives of Information on reducing prolonged sedentary behavior.  (Strongly disagree – strongly agree)  私は、長時間の座位行動を減らすための情報の内容や目的を知っている。  (全く当てはまらない－非常に当てはまる) |
| C2 | I know how to interrupt the prolonged sedentary behavior in the daytime hours at home.  (Strongly disagree – strongly agree)  私は、自宅で日中に長時間の座位行動を中断する方法を知っている。  (全く当てはまらない－非常に当てはまる) |
| C3 | I have the skills to interrupt prolonged sedentary behavior in the daytime at home.  (Strongly disagree – strongly agree)  私は、自宅で日中に長時間の座位行動を中断するスキルを持っている。  (全く当てはまらない－非常に当てはまる) |
| Motivation | M4 | I am confident that I can interrupt prolonged sedentary behavior in the daytime at home even when I am not motivated. (Strongly disagree – strongly agree)  やる気のないときでも、自宅で日中に長時間の座位行動を中断する自信がある。  (全く当てはまらない－非常に当てはまる) |
| M5 | I am confident that I can interrupt prolonged sedentary behavior in the daytime at home even when there is little time. (Strongly disagree – strongly agree)  時間がないときでも、自宅で日中に長時間の座位行動を中断する自信がある。  (全く当てはまらない－非常に当てはまる) |
| M6 | I am confident that if I wanted I could interrupt prolonged sedentary behavior in a daytime at home. (Strongly disagree – strongly agree)  その気になれば、自宅で日中に長時間の座位行動を中断する自信がある。  (全く当てはまらない－非常に当てはまる) |
| M7 | For me, interrupting prolonged sedentary behavior in the daytime at home is…  (Very difficult – very easy).  私にとって、自宅で日中に長時間の座位行動を中断することは...（とても難しい-とても簡単）なことである。 |
| M8 | With regard to interrupt prolonged sedentary behavior in the daytime at home I’m always optimistic about the future. (Strongly disagree – strongly agree)  自宅で日中に長時間の座位行動を中断することについては、いつも楽観的な見通しを持っている。(まったくそう思わない – 非常にそう思う) |
| M9 | With regard to interrupt prolonged sedentary behavior in the daytime at home overall, I expect more good things to happen than bad. (Strongly disagree – strongly agree)  自宅で日中に長時間の座位行動を中断することについては、悪いことよりも良いことが起きるのを期待している。(まったくそう思わない – 非常にそう思う) |
| M10 | With regard to interrupt prolonged sedentary behavior in the daytime at home I hardly ever expect things to go my way. (Strongly disagree – strongly agree)  自宅で日中に長時間の座位行動を中断することについては、自分の思い通りになるとは到底思えない。(まったくそう思わない – 非常にそう思う) |
| M11 | With regard to interrupt prolonged sedentary behavior in the daytime at home I rarely count on good things happening to me. (Strongly disagree – strongly agree)  自宅で日中に長時間の座位行動を中断することについては、ほとんど良いことは起こらないと思っている。(まったくそう思わない – 非常にそう思う) |
| M12 | For me, Interrupting prolonged sedentary behavior in the daytime at home is… (Useless – useful).  私にとって、自宅で日中に長時間の座位行動を中断することは…(役に立たない – 役に立つ)ことである。 |
| M13 | For me, interrupting prolonged sedentary behavior in the daytime at home is…(Bad – good).  私にとって、自宅で日中に長時間の座位行動を中断することは…(悪い – 良い)ことである。 |
| M14 | Whenever I interrupt prolonged sedentary behavior in the daytime at home, I get recognition from professionals who are important to me. (Never – always)  自宅で日中に長時間の座位行動を中断すると、私にとって重要な専門家から評価を受けることができる。(決してない – いつも) |
| M15 | I intend to interrupt prolonged sedentary behavior in your home in the next daytime.  (Strongly disagree – strongly agree)  次の日に、自宅で長時間の座位行動を中断するつもりである。  (全く当てはまらない－非常に当てはまる) |
| M16 | How strong is your intention to interrupt prolonged sedentary behavior in your home in the next daytime? (Not strong at all – very strong)  次の日に、自宅で長時間の座位行動を中断する意志はどの程度強いか。  (まったく強くない – 非常に強い) |
| M17 | I have a clear plan of how I will interrupt prolonged sedentary behavior in the daytime at home.  (Strongly disagree – strongly agree)  自宅で日中に長時間の座位行動をどの様な方法で中断するか、明確な計画を立てている。(全く当てはまらない－非常に当てはまる) |
| M18 | I have a clear plan under what circumstances I will interrupt prolonged sedentary behavior in the daytime at home. (Strongly disagree – strongly agree)  自宅で日中に長時間の座位行動をどのような状況で中断するか、明確な計画を立てている。(全く当てはまらない－非常に当てはまる) |
| M19 | I have a clear plan when I will interrupt prolonged sedentary behavior in the daytime at home.  (Strongly disagree – strongly agree)  自宅で日中に長時間の座位行動をいつ中断するか、明確な計画を立てている。  (全く当てはまらない－非常に当てはまる) |
| M20 | I have a clear plan how often I will interrupt prolonged sedentary behavior in the daytime at home.  (Strongly disagree – strongly agree)  自宅で日中に長時間の座位行動をどれだけの頻度で中断するか、明確な計画を立てている。(全く当てはまらない－非常に当てはまる) |
| M21 | Generally, in the daytime at home, how often is covering something else on your agenda a higher priority than interrupting prolonged sedentary behavior. (Never – always)  通常、日中に自宅で長時間の座位行動を中断することよりも、他の予定を優先することがどれくらい頻繁にありますか。(決してない – いつも) |
| M22 | Generally, in the daytime hours at home, how often is covering something else on your agenda more pressing than interrupting prolonged sedentary behavior. (Never – always)  通常、日中に自宅で長時間の座位行動を中断することよりも、他の急を要する物事を優先することがどれくらい頻繁にありますか。(決してない – いつも) |
| Capability | C23 | Interrupting prolonged sedentary behavior in a daytime at home is easy to remember.  (Strongly disagree – strongly agree)  自宅で日中に長時間の座位行動を中断することは、簡単に思い出せる。  (全く当てはまらない－非常に当てはまる) |
| C24 | When I need to concentrate to interrupt prolonged sedentary behavior in the daytime at home, I have no trouble focusing my attention.  (Strongly disagree – strongly agree)  自宅で日中に長時間の座位行動を中断するために集中する必要があるとき、問題なく注意を向けることができる。(全く当てはまらない－非常に当てはまる) |
| C25 | When I am working hard on interrupting prolonged sedentary behavior in the daytime at home, I still get distracted by events around me. (Strongly disagree – strongly agree)  自宅で日中に長時間の座位行動を中断することに努力しているとき、周りの出来事に気を取られてしまう。(全く当てはまらない－非常に当てはまる) |
| Opportunity | O26 | In my community I belong interrupting prolonged sedentary behavior in the daytime at home is routine. (Strongly disagree – strongly agree)  私が属するコミュニティでは、各自が自宅で日中に長時間の座位行動を中断することは日常的なことである。(全く当てはまらない－非常に当てはまる) |
| O27 | Within the socio-political context there is sufficient financial support (e.g., from local authorities, insurance companies, the government) for Information on reducing prolonged sedentary behavior.  (Strongly disagree – strongly agree)  社会政治的な状況において、長時間の座位行動を減らすことに関する情報に対して十分な経済的支援（例、地方自治体、保険会社、政府などから）がある。(全く当てはまらない－非常に当てはまる) |
| O28 | Within the socio-political context there are good networks between parties involved in Information on reducing prolonged sedentary behavior. (Strongly disagree – strongly agree)  社会政治的な状況において、長時間の座位行動を減らすための情報に関与する当事者間の良好なネットワークが存在する。(全く当てはまらない－非常に当てはまる) |
| O29 | I can rely on the team of professionals when things get tough on interrupting prolonged sedentary behavior in the daytime at home. (Strongly disagree – strongly agree)  自宅で日中に長時間の座位行動を中断することが厳しくなる場合は、専門家チームを頼ることができる。(全く当てはまらない－非常に当てはまる) |
| O30 | People around me are willing to listen to my problems related to interrupt prolonged sedentary behavior in the daytime at home. (Strongly disagree – strongly agree)  自宅で日中に長時間の座位行動を中断することに関する私の問題を、周りの人たちが聞こうとしてくれている。(全く当てはまらない－非常に当てはまる) |
| O31 | The team of professionals is helpful in getting interrupting prolonged sedentary behavior in a daytime at home done. (Strongly disagree – strongly agree)  専門家のチームは、自宅で日中に長時間の座位行動を中断することを手伝ってくれる。(全く当てはまらない－非常に当てはまる) |
| O32 | I can rely on people around me when things get tough on interrupting prolonged sedentary behavior in a daytime at home. (Strongly disagree – strongly agree)  自宅で日中に長時間の座位行動を中断することが厳しくなったとき、周囲の人たちに頼ることができる。(全く当てはまらない－非常に当てはまる) |
| O33 | Most people who are important to me think that I should interrupt prolonged sedentary behavior in the daytime at home. (Strongly disagree – strongly agree)  私にとって大切な人たちの大半は、私が自宅で日中に長時間の座位行動を中断すべきだと考えている。(全く当てはまらない－非常に当てはまる) |
| O34 | Respected people around me interrupt prolonged sedentary behavior in the daytime at home. (Strongly disagree – strongly agree)  私の周りのお手本とされている人たちは、自宅で日中に長時間の座位行動を中断している。(全く当てはまらない－非常に当てはまる) |
| Motivation | M35 | Thinking about yourself, to what extent do you generally feel inspired with regard to interrupt prolonged sedentary behavior in the daytime at home. (Never-always)  あなたは、自分自身のことを考えたときに、自宅で日中に長時間の座位行動を中断することに関して、普段はどの程度やる気を感じていますか。  (まったくない – いつもそうである) |
| M36 | Thinking about yourself, to what extent do you generally feel nervous with regard to interrupt prolonged sedentary behavior in the daytime at home. (Never-always)  あなたは、自分自身のことを考えたときに、自宅で日中に長時間の座位行動を中断することに関して、普段はどの程度不安を感じますか。  (まったくない – いつもそうである) |
| M37 | Interrupting prolonged sedentary behavior in the daytime at home is something I do automatically.  (Strongly disagree – strongly agree)  自宅で日中に長時間の座位行動を中断することは、意識せずにやっていることである。(全く当てはまらない－非常に当てはまる) |
| M38 | I keep track of my overall progress towards interrupting prolonged sedentary behavior in the daytime at home. (Strongly disagree – strongly agree)  私は、自宅で日中に長時間の座位行動を中断することに向けた全体的な進捗状況を記録している。(全く当てはまらない－非常に当てはまる) |
| M39 | I am aware of my day-to-day behavior as I work towards interrupting prolonged sedentary behavior in the daytime at home. (Strongly disagree – strongly agree)  私は、自宅で日中に長時間の座位行動を中断することに向けて努力しながら、日々の行動を自覚している。(全く当てはまらない－非常に当てはまる) |
| M40 | I check regularly whether I am getting closer to attaining making a habit of interrupting prolonged sedentary behavior in the daytime at home. (Strongly disagree – strongly agree)  私は、自宅で日中に長時間の座位行動を中断する習慣が身に付いているかどうか、定期的に確認している。(全く当てはまらない－非常に当てはまる) |

* Item numbers of the second version used in the main survey, evaluated for face and content validity.
