# Supplementary material for: Development and validation of the Sedentary Behavior Interruption Questionnaire (SB-IQ) for Assessing Behavioral Determinants in Older Adults Requiring Long-Term Care: a cross-sectional study
Source: Research Square preprint supplement (doi:10.21203/rs.3.rs-8556119/v1), 2026-02-09
Supplement: Supplementary file 3 [file c250f98e3dcbf497bc72e6b8.docx]

| Domain | 2nd item label | Final item label | Question |
| --- | --- | --- | --- |
|
| Capability | C1 | 1 | I know the content and objectives of Information on reducing prolonged sedentary behavior.  Score: Strongly disagree < 1 ・ 2 ・ 3 ・ 4 ・ 5 ・ 6 ・ 7 > Strongly agree |
| C2 | 2 | I know how to interrupt the prolonged sedentary behavior in the daytime hours at home.  Score: Strongly disagree < 1 ・ 2 ・ 3 ・ 4 ・ 5 ・ 6 ・ 7 > Strongly agree |
| C3 | 3 | I have the skills to interrupt prolonged sedentary behavior in the daytime at home.  Score: Strongly disagree < 1 ・ 2 ・ 3 ・ 4 ・ 5 ・ 6 ・ 7 > Strongly agree |
| C23 | 4 | Interrupting prolonged sedentary behavior in a daytime at home is easy to remember.  Score: Strongly disagree < 1 ・ 2 ・ 3 ・ 4 ・ 5 ・ 6 ・ 7 > Strongly agree |
| C24 | 5 | When I need to concentrate to interrupt prolonged sedentary behavior in the daytime at home, I have no trouble focusing my attention.  Score: Strongly disagree < 1 ・ 2 ・ 3 ・ 4 ・ 5 ・ 6 ・ 7 > Strongly agree |
| Opportunity | O27 | 6 | Within the socio-political context there is sufficient financial support (e.g., from local authorities, insurance companies, the government) for Information on reducing prolonged sedentary behavior.  Score: Strongly disagree < 1 ・ 2 ・ 3 ・ 4 ・ 5 ・ 6 ・ 7 > Strongly agree |
| O28 | 7 | Within the socio-political context there are good networks between parties involved in Information on reducing prolonged sedentary behavior.  Score: Strongly disagree < 1 ・ 2 ・ 3 ・ 4 ・ 5 ・ 6 ・ 7 > Strongly agree |
| O29 | 8 | I can rely on the team of professionals when things get tough on interrupting prolonged sedentary behavior in the daytime at home.  Score: Strongly disagree < 1 ・ 2 ・ 3 ・ 4 ・ 5 ・ 6 ・ 7 > Strongly agree |
| O30 | 9 | People around me are willing to listen to my problems related to interrupt prolonged sedentary behavior in the daytime at home.  Score: Strongly disagree < 1 ・ 2 ・ 3 ・ 4 ・ 5 ・ 6 ・ 7 > Strongly agree |
| O31 | 10 | The team of professionals is helpful in getting interrupting prolonged sedentary behavior in a daytime at home done.  Score: Strongly disagree < 1 ・ 2 ・ 3 ・ 4 ・ 5 ・ 6 ・ 7 > Strongly agree |
| O32 | 11 | I can rely on people around me when things get tough on interrupting prolonged sedentary behavior in a daytime at home.  Score: Strongly disagree < 1 ・ 2 ・ 3 ・ 4 ・ 5 ・ 6 ・ 7 > Strongly agree |
| O33 | 12 | Most people who are important to me think that I should interrupt prolonged sedentary behavior in the daytime at home.  　 Score: Strongly disagree < 1 ・ 2 ・ 3 ・ 4 ・ 5 ・ 6 ・ 7 > Strongly agree |
| O34 | 13 | Respected people around me interrupt prolonged sedentary behavior in the daytime at home.  Score: Strongly disagree < 1 ・ 2 ・ 3 ・ 4 ・ 5 ・ 6 ・ 7 > Strongly agree |
| Beliefs about consequences | M9 | 14 | With regard to interrupt prolonged sedentary behavior in the daytime at home overall, I expect more good things to happen than bad.  　 Score: Strongly disagree < 1 ・ 2 ・ 3 ・ 4 ・ 5 ・ 6 ・ 7 > Strongly agree |
| M12 | 15 | For me, Interrupting prolonged sedentary behavior in the daytime at home is… (Useless – useful).  　 Score: Useless < 1 ・ 2 ・ 3 ・ 4 ・ 5 ・ 6 ・ 7 > Useful |
| M13 | 16 | For me, interrupting prolonged sedentary behavior in the daytime at home is…(Bad – good).  　 Score: Bad < 1 ・ 2 ・ 3 ・ 4 ・ 5 ・ 6 ・ 7 > Good |
| Goals | M17 | 17 | I have a clear plan of how I will interrupt prolonged sedentary behavior in the daytime at home.  　 Score: Strongly disagree < 1 ・ 2 ・ 3 ・ 4 ・ 5 ・ 6 ・ 7 > Strongly agree |
| M18 | 18 | I have a clear plan under what circumstances I will interrupt prolonged sedentary behavior in the daytime at home.  　 Score: Strongly disagree < 1 ・ 2 ・ 3 ・ 4 ・ 5 ・ 6 ・ 7 > Strongly agree |
| M19 | 19 | I have a clear plan when I will interrupt prolonged sedentary behavior in the daytime at home.  　 Score: Strongly disagree < 1 ・ 2 ・ 3 ・ 4 ・ 5 ・ 6 ・ 7 > Strongly agree |
| M20 | 20 | I have a clear plan how often I will interrupt prolonged sedentary behavior in the daytime at home.  Score: Strongly disagree < 1 ・ 2 ・ 3 ・ 4 ・ 5 ・ 6 ・ 7 > Strongly agree |
| Beliefs about capabilities | M4 | 21 | I am confident that I can interrupt prolonged sedentary behavior in the daytime at home even when I am not motivated.  　 Score: Strongly disagree < 1 ・ 2 ・ 3 ・ 4 ・ 5 ・ 6 ・ 7 > Strongly agree |
| M5 | 22 | I am confident that I can interrupt prolonged sedentary behavior in the daytime at home even when there is little time.  　 Score: Strongly disagree < 1 ・ 2 ・ 3 ・ 4 ・ 5 ・ 6 ・ 7 > Strongly agree |
| M6 | 23 | I am confident that if I wanted I could interrupt prolonged sedentary behavior in a daytime at home.  　 Score: Strongly disagree < 1 ・ 2 ・ 3 ・ 4 ・ 5 ・ 6 ・ 7 > Strongly agree |
| M7 | 24 | For me, interrupting prolonged sedentary behavior in the daytime at home is… (Very difficult – very easy).  　 Score: Very difficult < 1 ・ 2 ・ 3 ・ 4 ・ 5 ・ 6 ・ 7 > Very easy |
| M8 | 25 | With regard to interrupt prolonged sedentary behavior in the daytime at home I’m always optimistic about the future.  　 Score: Strongly disagree < 1 ・ 2 ・ 3 ・ 4 ・ 5 ・ 6 ・ 7 > Strongly agree |
| Behavioral regulation | M38 | 26 | I keep track of my overall progress towards interrupting prolonged sedentary behavior in the daytime at home.  Score: Strongly disagree < 1 ・ 2 ・ 3 ・ 4 ・ 5 ・ 6 ・ 7 > Strongly agree |
| M39 | 27 | I am aware of my day-to-day behavior as I work towards interrupting prolonged sedentary behavior in the daytime at home.  Score: Strongly disagree < 1 ・ 2 ・ 3 ・ 4 ・ 5 ・ 6 ・ 7 > Strongly agree |
| M40 | 28 | I check regularly whether I am getting closer to attaining making a habit of interrupting prolonged sedentary behavior in the daytime at home.  　 Score: Strongly disagree < 1 ・ 2 ・ 3 ・ 4 ・ 5 ・ 6 ・ 7 > Strongly agree |
